# Supplementary material for: A PdCu nanoalloy catalyst for preferential CO oxidation in the presence of hydrogen
Source: Royal Society of Chemistry journal article supplement (doi:10.1039/d1nj00005e), 2021-01-01
Supplement: d1nj00005e1.pdf [file d1nj00005e1.pdf]

## Supporting Information

### PdCu Nanoalloy Catalyst for Preferential CO Oxidation in the Presence of Hydrogen

Rohini Khobragade,<sup>a</sup> Pranali Dahake,<sup>a</sup> Nitin Labhsetwar,<sup>a</sup> Govindachetty Saravanan,<sup>\*b</sup>

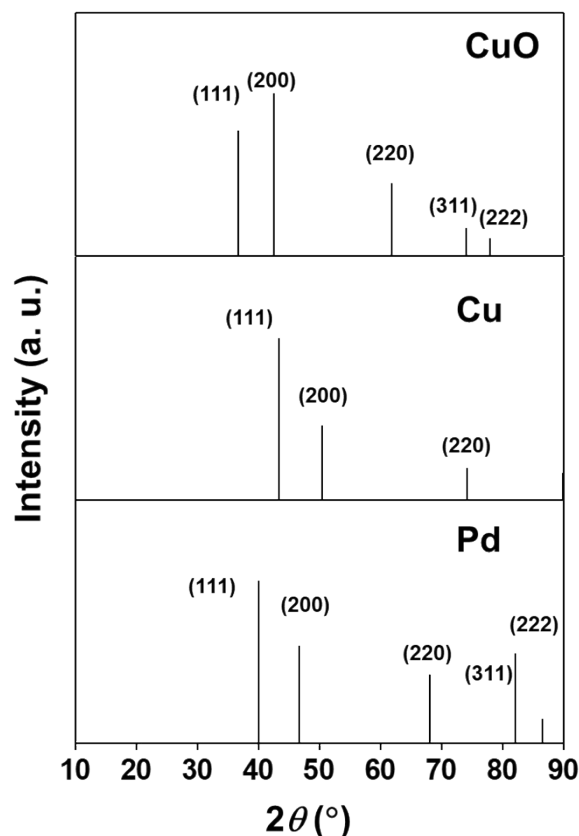

Figure S1. Simulated XRD lines for Pd, Cu and CuO.

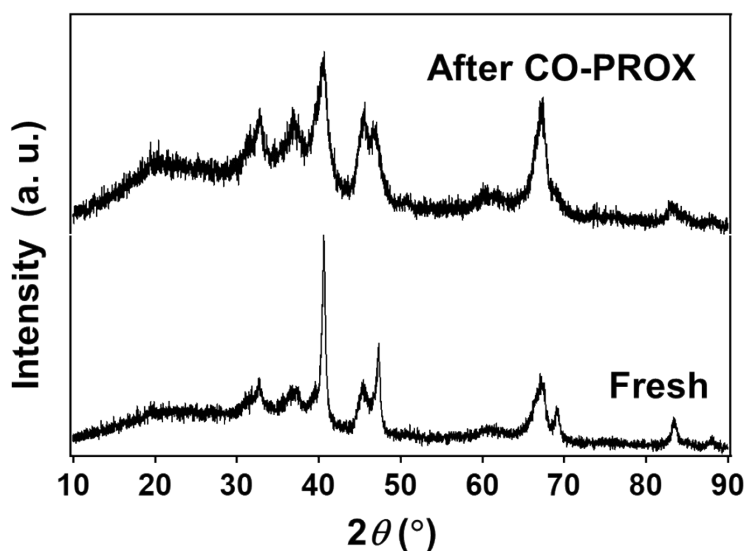

Figure S2. Comparison of pXRD profiles of the alloy PDCu catalyst before and after the CO-PROX reaction.
